# Supplementary material for: NLRC4 suppresses melanoma tumor progression independently of inflammasome activation
Source: JCI journal article supplement (doi:10.1172/jci86953), 2016-09-11
Supplement: sd1 [file 1]

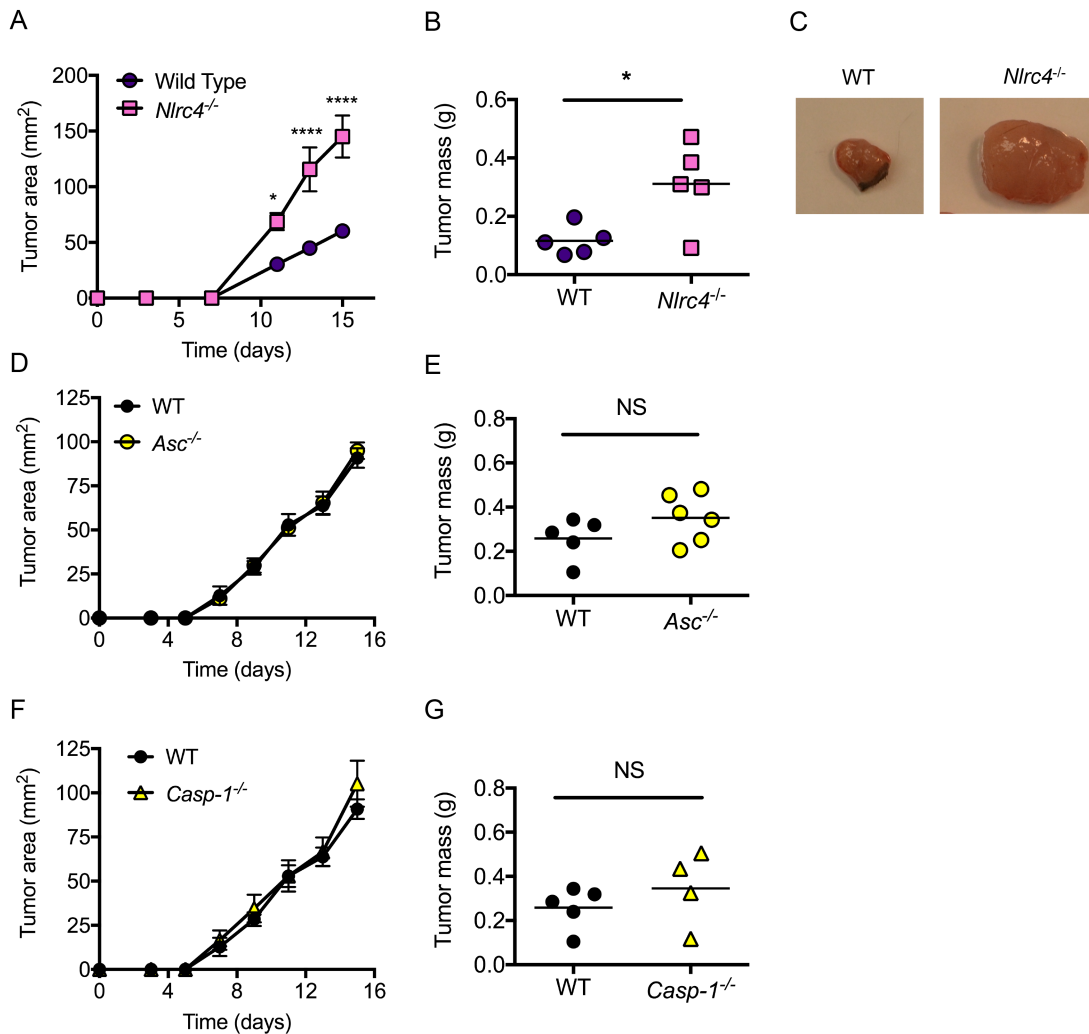

**Supplemental Figure 1.** NLR4 protects against LLC tumor growth in vivo. (A-G) WT, *Nlr4*<sup>-/-</sup>, *Asc*<sup>-/-</sup>, and *Casp-1*<sup>-/-</sup> mice were injected s.c. with  $5 \times 10^5$  LLC cells. (A, D, F) Tumor area (length x width) was measured every 2-3 days and (B, E, G) tumors mass was determined 15 days post-inoculation. (C) Representative images of WT and *Nlr4*<sup>-/-</sup> LLC tumors. n=4-5 mice per group. (A, D, F) Error bars represent SEM. (B, E, G) \*  $p \leq 0.05$  and NS denotes not significant by unpaired two-tailed Student's *t*-test. (A) \*  $p \leq 0.05$  and \*\*\*\*  $p \leq 0.0001$  by two-way ANOVA with Sidak's multiple comparisons test.

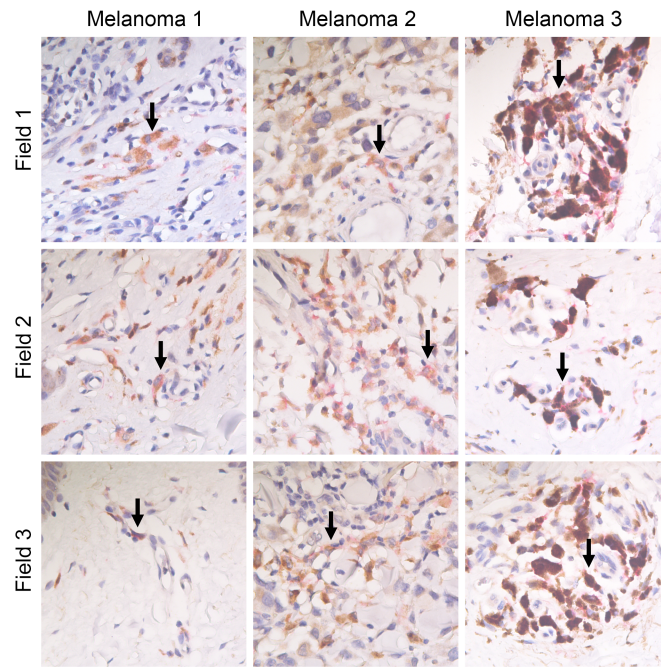

**Supplemental Figure 2.** CD163<sup>+</sup> macrophages in primary invasive melanomas co-stain with NLRC4. The three primary invasive melanomas used in Figure 2 were stained for CD163 using 3,3'-Diaminobenzidine (brown) and NLRC4 using Permanent Red (red). Three representative sections per melanoma are shown with an arrow identifying the clearest example of CD163<sup>+</sup>NLRC4<sup>+</sup> tumor-associated macrophages in each panel.

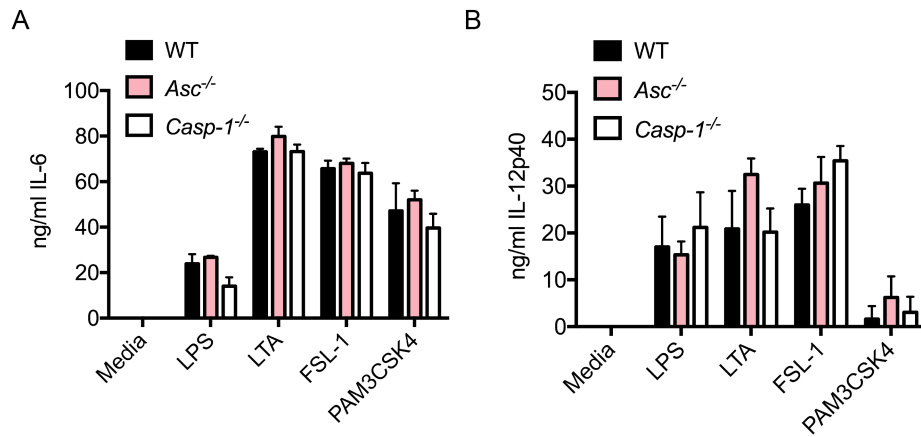

**Supplemental Figure 3.** IL-6 and IL-12p40 production are intact in *Asc*<sup>-/-</sup> and *Casp1*<sup>-/-</sup> BMDM. (A, B) WT, *Asc*<sup>-/-</sup>, and *Casp1*<sup>-/-</sup> BMDM were challenged with 50 ng/ml LPS, 50 μg/ml LTA, 100 ng/ml FSL-1, and 1 μg/ml Pam3CSK4. 20 hours later IL-6 and IL-12p40 levels in the supernatants was determined by ELISA. Determinations were performed in triplicate and are representative of 2 independent experiments. Error bars represent SD.

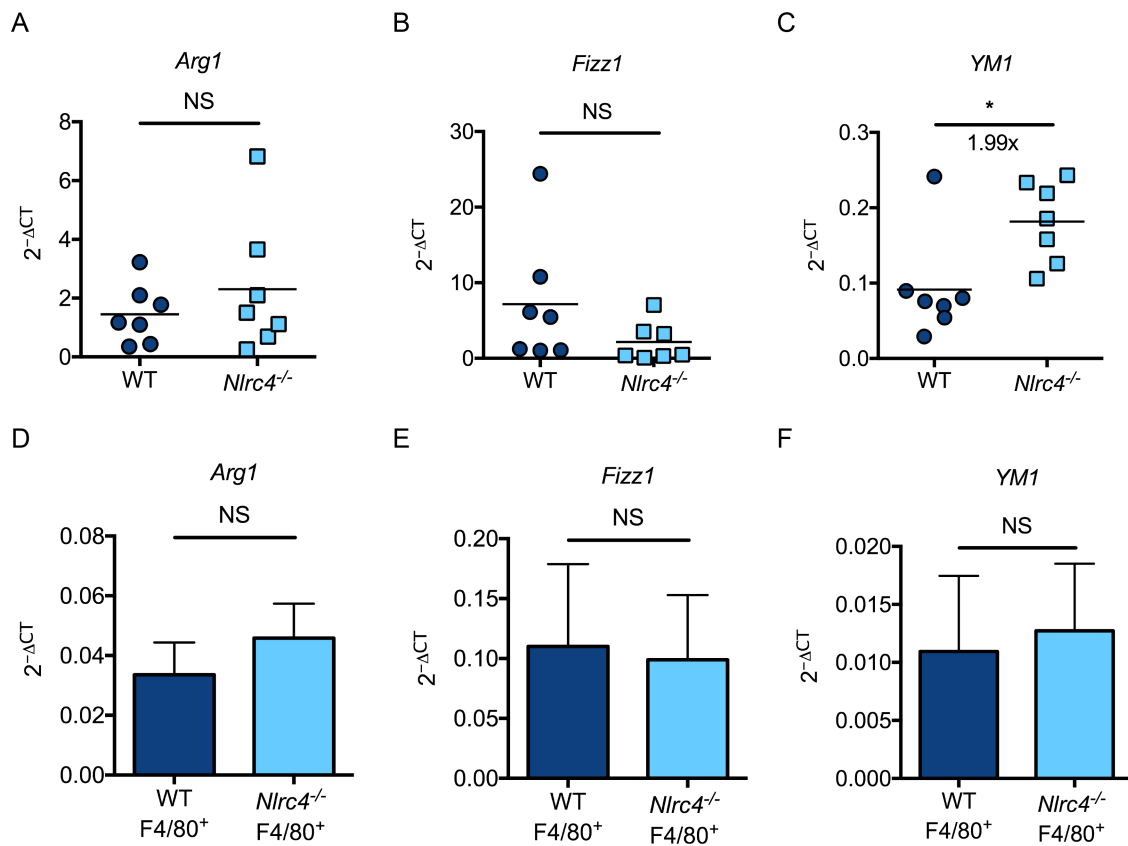

**Supplemental Figure 4.** Expression of M2 macrophage associated genes are similar in tumors and tumor-associated macrophages from WT and *Nlrc4*<sup>-/-</sup> mice. (A-C) WT and *Nlrc4*<sup>-/-</sup> mice were injected s.c. with  $1 \times 10^5$  B16F10 cells. Day 14 post-inoculation total RNA was isolated from homogenized tumors and used to determine expression of *Arg1* (A), *Fizz1* (B), and *Ym1* (C). Data are pooled from two independent experiments with  $n=7$  mice per group. (D-F) WT and *Nlrc4*<sup>-/-</sup> mice were injected s.c. with  $1 \times 10^5$  B16F10 cells; 14 days post-inoculation tumors were harvested, pooled, and CD45.2<sup>+</sup>F4/80<sup>+</sup> cells were FACS sorted. RNA was isolated from CD45.2<sup>+</sup>F4/80<sup>+</sup> cells and used to determine expression of *Arg1* (D), *Fizz1* (E), and *Ym1* (F) by qPCR. Data are pooled from three independent experiments each with  $n \geq 5$  pooled tumors per group. Error bars represent SEM. \*  $p \leq 0.05$  and NS denotes not significant by unpaired two-tailed Student's *t*-test.

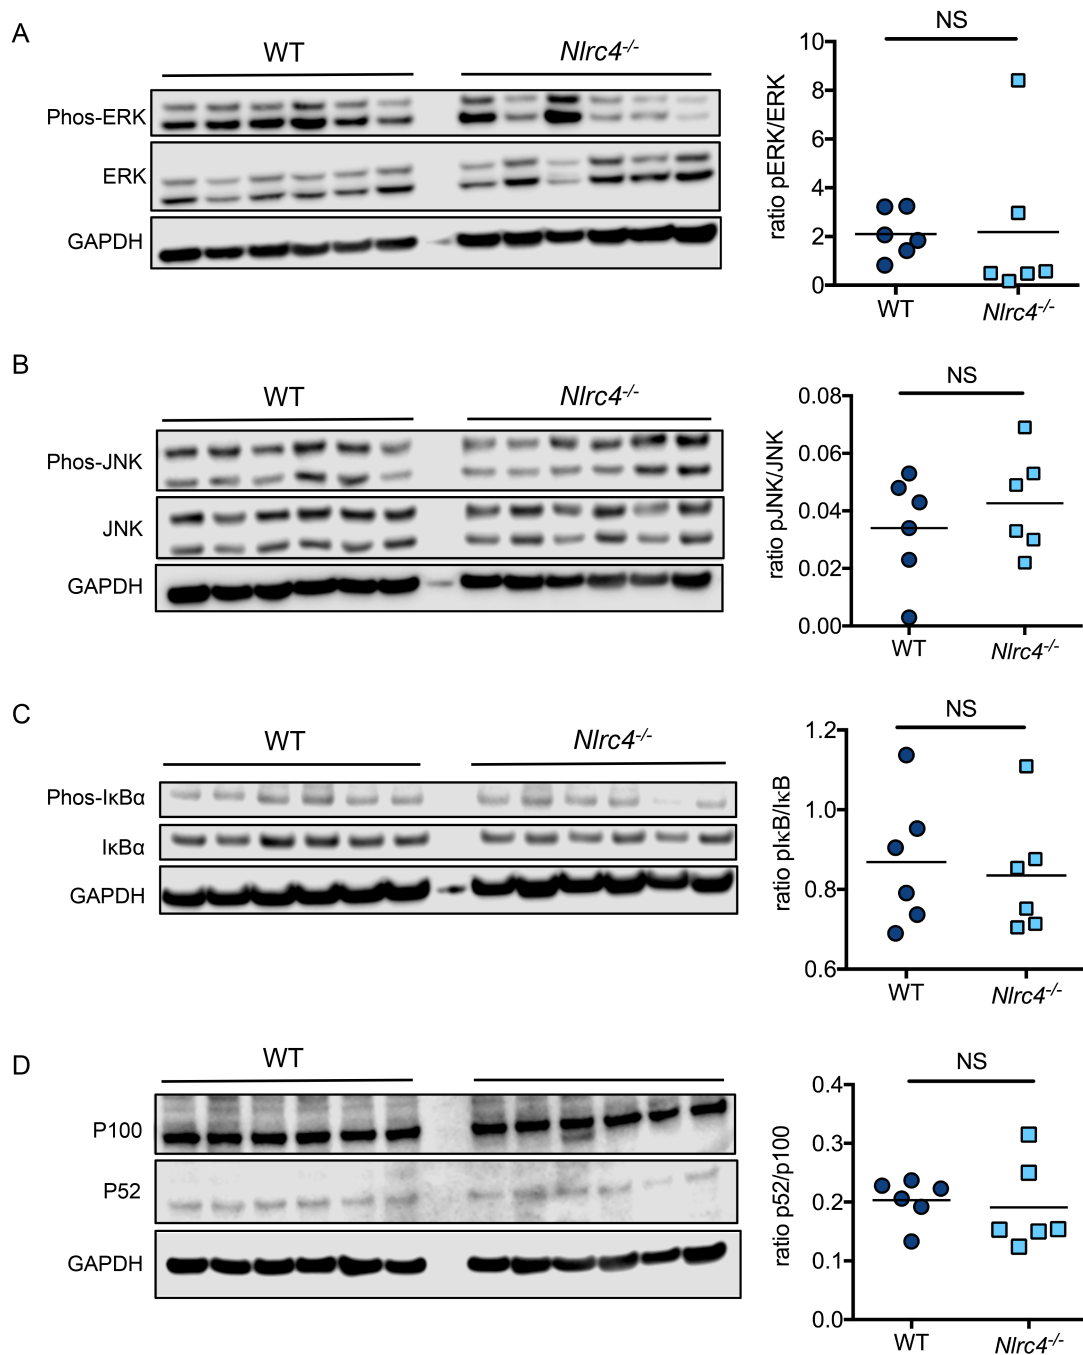

**Supplemental Figure 5.** Evaluation of MAPK and NF- $\kappa$ B signaling pathways in tumors from NLRC4-deficient mice. (A-D) B16F10 tumors from WT and *Nlrc4*<sup>-/-</sup> mice day 14 post-inoculation were homogenized and immunoblotted with antibodies against phospho-p44/42 MAPK (Erk1/2) and p44/42 MAPK (Erk1/2) (A), phospho-SAPK/JNK and SAPK/JNK (B), phospho-I $\kappa$ B $\alpha$  and I $\kappa$ B $\alpha$  (C), NF- $\kappa$ B2 p52/p100 (D), and GAPDH (A-D). Densitometry of the ratio of phosphorylated to total protein or p52 to p100 are depicted. Each lane represents a tumor from an individual mouse. NS denotes not significant by unpaired two-tailed Student's *t*-test.

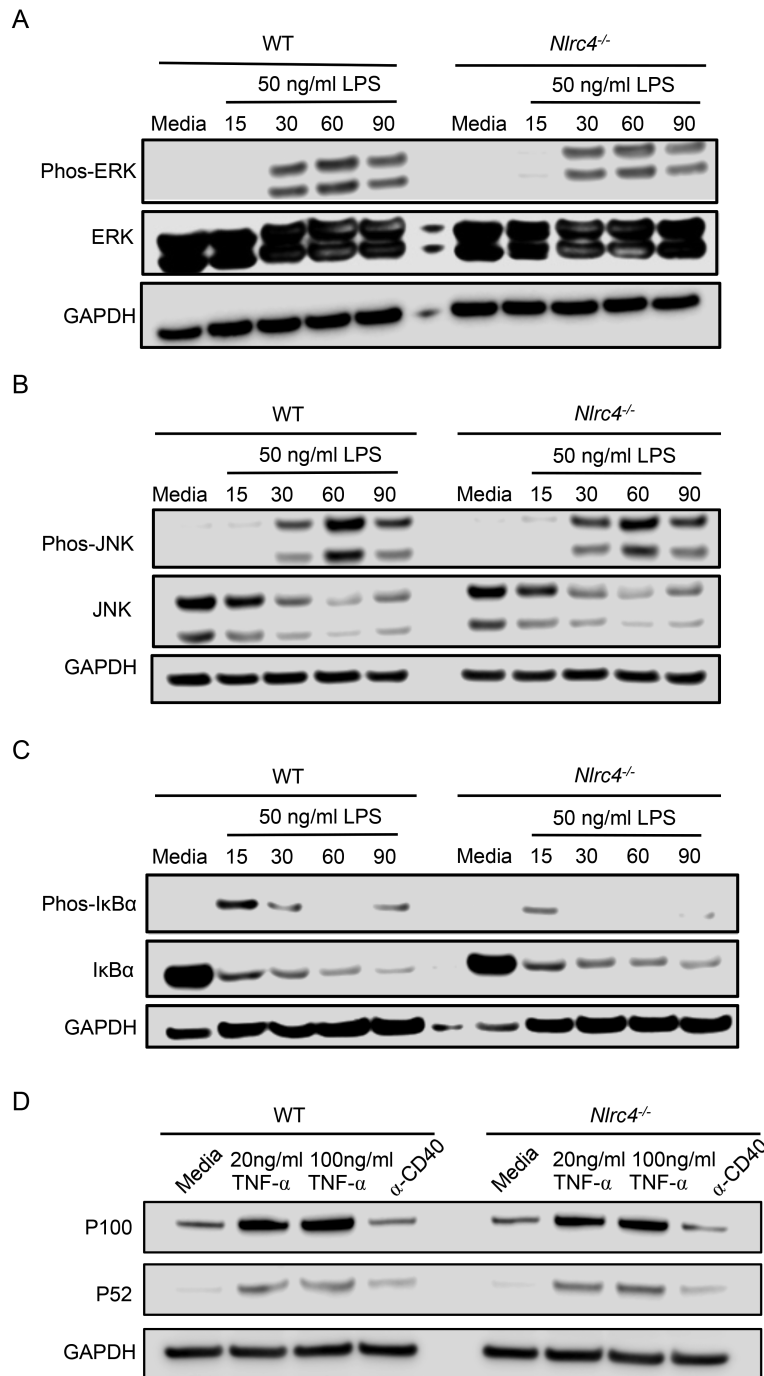

**Supplemental Figure 6.** Comparison of MAPK and NF- $\kappa$ B signaling pathways in WT and *Nlrc4*<sup>-/-</sup> BMDM. (A-C) WT and *Nlrc4*<sup>-/-</sup> BMDM were challenged for 15, 30, 60 and 90 minutes with 50 ng/ml LPS. Cell lysates were immunoblotted with antibodies against phospho-p44/42 MAPK (Erk1/2) and p44/42 MAPK (Erk1/2) (A), phospho-SAPK/JNK and SAPK/JNK (B), phospho-I $\kappa$ B $\alpha$  and I $\kappa$ B $\alpha$  (C), and GAPDH (A-C). (D) WT and *Nlrc4*<sup>-/-</sup> BMDM were challenged with 20 ng/ml TNF- $\alpha$ , 100 ng/ml TNF- $\alpha$ , or 10  $\mu$ g/ml anti-CD40 antibody for 18 hours. Cell lysates were immunoblotted with antibodies against NF- $\kappa$ B2 p52/p100 and GAPDH. Data are representative of 3 independent experiments.

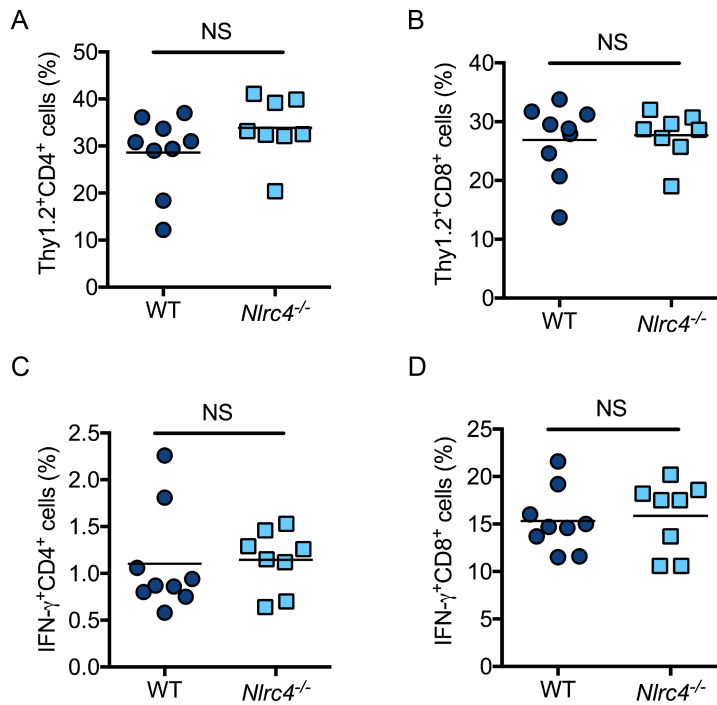

**Supplemental Figure 7.** IFN- $\gamma$  production by CD4<sup>+</sup> and CD8<sup>+</sup> T cells is not altered in the tumor draining lymph node of *Nlrc4*<sup>-/-</sup> mice. (A-D) WT and *Nlrc4*<sup>-/-</sup> mice were injected s.c. with  $1 \times 10^5$  B16F10 cells and at day 14 post-inoculation tumor draining lymph nodes were harvested for analysis by flow cytometry. Frequency of CD4<sup>+</sup>Thy1.2<sup>+</sup> cells (A) and CD8<sup>+</sup>Thy1.2<sup>+</sup> cells (B) from the tumor draining lymph node is shown. (C, D) Cells from the tumor draining lymph node were stimulated with PMA and ionomycin followed by intracellular cytokine staining for IFN- $\gamma$ . Frequency of CD4<sup>+</sup> IFN- $\gamma$ <sup>+</sup> T cells (C) and CD8<sup>+</sup> IFN- $\gamma$ <sup>+</sup> T cells (D) are shown.  $n \geq 8$  mice per group. NS denotes not significant by unpaired two-tailed Student's *t*-test.

**Supplemental Table 1.** B16F10 tumors from *Nlr4*<sup>-/-</sup> mice have decreased cytokine and chemokine expression. Full table of cytokines and chemokines from Qiagen RT<sup>2</sup> profiler PCR array on B16F10 tumors from WT and *Nlr4*<sup>-/-</sup> mice. Select cytokines and chemokines are shown in Figure 5.

| <b>Cytokine/<br/>Chemokine</b> | <b>Descriptive name</b>                                | <b>Wild Type<br/>2<sup>ΔCT</sup></b> | <b><i>Nlr4</i><sup>-/-</sup><br/>2<sup>ΔCT</sup></b> | <b>Fold change<br/>relative to <i>Nlr4</i><sup>-/-</sup></b> |
|--------------------------------|--------------------------------------------------------|--------------------------------------|------------------------------------------------------|--------------------------------------------------------------|
| <b>Cxcl5</b>                   | Chemokine (C-X-C motif) ligand 5                       | 0.00159                              | 0.00008                                              | 18.92516                                                     |
| <b>Cxcl9</b>                   | Chemokine (C-X-C motif) ligand 9                       | 0.00812                              | 0.00044                                              | 18.54929                                                     |
| <b>Cxcl13</b>                  | Chemokine (C-X-C motif) ligand 13                      | 0.00301                              | 0.00039                                              | 7.81542                                                      |
| <b>Cxcl16</b>                  | Chemokine (C-X-C motif) ligand 16                      | 0.02418                              | 0.00384                                              | 6.29930                                                      |
| <b>Ifng</b>                    | Interferon gamma                                       | 0.00097                              | 0.00019                                              | 5.15934                                                      |
| <b>Ccl11</b>                   | Chemokine (C-C motif) ligand 11                        | 0.00532                              | 0.00108                                              | 4.90841                                                      |
| <b>Ccl5</b>                    | Chemokine (C-C motif) ligand 5                         | 0.02279                              | 0.00503                                              | 4.52788                                                      |
| <b>Ccl4</b>                    | Chemokine (C-C motif) ligand 4                         | 0.00929                              | 0.00223                                              | 4.16989                                                      |
| <b>Tnfsf10</b>                 | Tumor necrosis factor (ligand) superfamily, member 10  | 0.00082                              | 0.00021                                              | 3.85346                                                      |
| <b>Fasl</b>                    | Fas ligand                                             | 0.00043                              | 0.00012                                              | 3.70580                                                      |
| <b>Tnf</b>                     | Tumor necrosis factor                                  | 0.00167                              | 0.00047                                              | 3.53300                                                      |
| <b>Il1rn</b>                   | Interleukin 1 receptor antagonist                      | 0.00729                              | 0.00207                                              | 3.52900                                                      |
| <b>Xcl1</b>                    | Chemokine (C motif) ligand 1                           | 0.00183                              | 0.00052                                              | 3.49379                                                      |
| <b>Cxcl12</b>                  | Chemokine (C-X-C motif) ligand 12                      | 0.00843                              | 0.00265                                              | 3.17839                                                      |
| <b>Il12b</b>                   | Interleukin 12B                                        | 0.00091                              | 0.00029                                              | 3.16666                                                      |
| <b>Il16</b>                    | Interleukin 16                                         | 0.00137                              | 0.00044                                              | 3.11653                                                      |
| <b>Il27</b>                    | Interleukin 27                                         | 0.00079                              | 0.00028                                              | 2.87949                                                      |
| <b>Il10</b>                    | Interleukin 10                                         | 0.00060                              | 0.00023                                              | 0.00023                                                      |
| <b>Ccl3</b>                    | Chemokine (C-C motif) ligand 3                         | 0.00555                              | 0.00212                                              | 2.61188                                                      |
| <b>Ccl7</b>                    | Chemokine (C-C motif) ligand 7                         | 0.04146                              | 0.01715                                              | 2.41752                                                      |
| <b>Ltb</b>                     | Lymphotoxin B                                          | 0.00209                              | 0.00087                                              | 2.40942                                                      |
| <b>Ccl12</b>                   | Chemokine (C-C motif) ligand 12                        | 0.01751                              | 0.00800                                              | 2.18919                                                      |
| <b>Cxcl10</b>                  | Chemokine (C-X-C motif) ligand 10                      | 0.12356                              | 0.05665                                              | 2.18108                                                      |
| <b>Il11</b>                    | Interleukin 11                                         | 0.00062                              | 0.00030                                              | 2.09779                                                      |
| <b>Ccl22</b>                   | Chemokine (C-C motif) ligand 22                        | 0.00218                              | 0.00104                                              | 2.08825                                                      |
| <b>Tnfsf13b</b>                | Tumor necrosis factor (ligand) superfamily, member 13b | 0.00046                              | 0.00023                                              | 2.01492                                                      |
| <b>Cx3cl1</b>                  | Chemokine (C-X3-C motif) ligand 1                      | 0.00263                              | 0.00132                                              | 2.00060                                                      |
| <b>Tnfrsf11b</b>               | Tumor necrosis factor receptor superfamily, member 11b | 0.00621                              | 0.00318                                              | 1.95353                                                      |
| <b>Spp1</b>                    | Secreted phosphoprotein 1                              | 0.05356                              | 0.02813                                              | 1.90386                                                      |
| <b>Tnfsf11</b>                 | Tumor necrosis factor (ligand) superfamily, member 11  | 0.00038                              | 0.00021                                              | 1.86315                                                      |



|               |                                   |         |         |         |
|---------------|-----------------------------------|---------|---------|---------|
| <b>Il1a</b>   | Interleukin 1 alpha               | 0.00084 | 0.00045 | 1.84969 |
| <b>Ccl1</b>   | Chemokine (C-C motif) ligand 1    | 0.00042 | 0.00023 | 1.84633 |
| <b>Lif</b>    | Leukemia inhibitory factor        | 0.00074 | 0.00041 | 1.78131 |
| <b>Cd70</b>   | CD70 antigen                      | 0.00033 | 0.00018 | 1.78027 |
| <b>Csf1</b>   | Colony stimulating factor 1       | 0.00567 | 0.00321 | 1.76902 |
| <b>CD40lg</b> | CD40 ligand                       | 0.00014 | 0.00008 | 1.71351 |
| <b>Ccl19</b>  | Chemokine (C-C motif) ligand 19   | 0.00631 | 0.00369 | 1.71161 |
| <b>Mstn</b>   | Myostatin                         | 0.00066 | 0.00040 | 1.66271 |
| <b>Ccl20</b>  | Chemokine (C-C motif) ligand 20   | 0.00028 | 0.00017 | 1.65709 |
| <b>Csf3</b>   | Colony stimulating factor 3       | 0.00033 | 0.00020 | 1.64588 |
| <b>Il7</b>    | Interleukin 7                     | 0.00029 | 0.00018 | 1.64310 |
| <b>Il15</b>   | Interleukin 15                    | 0.00125 | 0.00078 | 1.59683 |
| <b>Il18</b>   | Interleukin 18                    | 0.00543 | 0.00347 | 1.56592 |
| <b>Ccl2</b>   | Chemokine (C-C motif) ligand 2    | 0.02886 | 0.01848 | 1.56165 |
| <b>Csf2</b>   | Colony stimulating factor 2       | 0.00027 | 0.00018 | 1.54081 |
| <b>Il17a</b>  | Interleukin 17A                   | 0.00008 | 0.00006 | 1.47224 |
| <b>Il12a</b>  | Interleukin 12A                   | 0.00024 | 0.00017 | 1.45716 |
| <b>Il24</b>   | Interleukin 24                    | 0.00028 | 0.00019 | 1.41821 |
| <b>Il21</b>   | Interleukin 21                    | 0.00014 | 0.00010 | 1.38019 |
| <b>Hc</b>     | Hemolytic complement              | 0.00034 | 0.00025 | 1.35328 |
| <b>Il5</b>    | Interleukin 5                     | 0.00039 | 0.00029 | 1.34847 |
| <b>Bmp2</b>   | Bone morphogenetic protein 2      | 0.00078 | 0.00058 | 1.33497 |
| <b>Lta</b>    | Lymphotoxin A                     | 0.00044 | 0.00033 | 1.33224 |
| <b>Il17f</b>  | Interleukin 17F                   | 0.00033 | 0.00025 | 1.32738 |
| <b>Il2</b>    | Interleukin 2                     | 0.00023 | 0.00017 | 1.30518 |
| <b>Ifna2</b>  | Interferon alpha 2                | 0.00033 | 0.00026 | 1.29424 |
| <b>Il22</b>   | Interleukin 22                    | 0.00034 | 0.00027 | 1.28006 |
| <b>Bmp6</b>   | Bone morphogenetic protein 6      | 0.00035 | 0.00028 | 1.25181 |
| <b>Il3</b>    | Interleukin 3                     | 0.00031 | 0.00026 | 1.22028 |
| <b>Il9</b>    | Interleukin 9                     | 0.00019 | 0.00016 | 1.20566 |
| <b>Il13</b>   | Interleukin 13                    | 0.00028 | 0.00023 | 1.19427 |
| <b>Il4</b>    | Interleukin 4                     | 0.00043 | 0.00037 | 1.16699 |
| <b>Thpo</b>   | Thrombopoietin                    | 0.00037 | 0.00032 | 1.14787 |
| <b>Nodal</b>  | Nodal                             | 0.00023 | 0.00021 | 1.13964 |
| <b>Cxcl11</b> | Chemokine (C-X-C motif) ligand 11 | 0.00033 | 0.00030 | 1.12890 |

|               |                                                 |         |         |          |
|---------------|-------------------------------------------------|---------|---------|----------|
| <b>Il6</b>    | Interleukin 6                                   | 0.00057 | 0.00054 | 1.06581  |
| <b>Cntf</b>   | Ciliary neurotrophic factor                     | 0.00072 | 0.00070 | 1.03102  |
| <b>Ccl17</b>  | Chemokine (C-C motif) ligand 17                 | 0.00112 | 0.00114 | -1.01912 |
| <b>Ctf1</b>   | Cardiotrophin 1                                 | 0.00035 | 0.00037 | -1.05448 |
| <b>Bmp4</b>   | Bone morphogenetic protein 4                    | 0.00115 | 0.00135 | -1.17356 |
| <b>Tgfb2</b>  | Transforming growth factor, beta 2              | 0.00249 | 0.00293 | -1.17921 |
| <b>Bmp7</b>   | Bone morphogenetic protein 7                    | 0.00069 | 0.00083 | -1.19182 |
| <b>Pf4</b>    | Platelet factor 4                               | 0.01994 | 0.02467 | -1.23679 |
| <b>Il23a</b>  | Interleukin 23, alpha subunit p19               | 0.00036 | 0.00046 | -1.28299 |
| <b>Cxcl1</b>  | Chemokine (C-X-C motif) ligand 1                | 0.00033 | 0.00045 | -1.33535 |
| <b>Ccl24</b>  | Chemokine (C-C motif) ligand 24                 | 0.00021 | 0.00028 | -1.34812 |
| <b>Mif</b>    | Macrophage migration inhibitory factor          | 5.39932 | 7.54029 | -1.39653 |
| <b>Gpil</b>   | Glucose phosphatase isomerase 1                 | 1.01432 | 1.54162 | -1.51985 |
| <b>Osm</b>    | Oncostatin M                                    | 0.00079 | 0.00124 | -1.57051 |
| <b>Vegfa</b>  | Vascular endothelial growth factor A            | 0.02908 | 0.04833 | -1.66193 |
| <b>Cxcl3</b>  | Chemokine (C-X-C motif) ligand 3                | 0.00037 | 0.00064 | -1.75844 |
| <b>Adipoq</b> | Adiponectin, C1Q and collagen domain containing | 0.00158 | 0.00294 | -1.85462 |
| <b>Il1b</b>   | Interleukin 1 beta                              | 0.00227 | 0.00456 | -2.00574 |
| <b>Pbbp</b>   | Pro-platelet basic protein                      | 0.00051 | 0.00336 | -6.59844 |
